# Supplementary material
Source: PubMed Central journal article supplement (PMC1761978)
Supplement: plntphys_pp.106.090688_2.pdf [file plntphys_pp.106.090688_2.pdf]

|                   | Oe07g41330TIM17-A | Oe03g30200TIM17-B | Oe05g07250TIM17-C | Oe03g30220TIM17-D | Oe03g30230TIM17-E | Oe03g18500TIM22-A | Oe03g09870TIM22-B | Oe10g22040TIM22-C | Oe12g33020TIM22-D | Oe03g02390TIM23-A | Oe10g37530TIM23-B | Oe02g45100TIM23-C | Oe03g47500TIM23-D | Oe04g47900TIM23-E | Oe07g16150TIM23-F | A1g17530TIM23-1 | A1g172750TIM23-2 | A3g04800TIM23-3 | A1g20350TIM17-1 | A2g37410TIM17-2 | A5g11690TIM17-3 | A3g10110TIM22-2 | A1g18320TIM22-1 | A4g26670 | A5g55510 | A3g49560 | A5g24650 | A2g28900 | A4g16160 | A2g42210 | A3g62880 | A3g25120 | YeastTIM17 | YeastTIM23 | YeastTIM22 | Pea OEP16 |
|-------------------|-------------------|-------------------|-------------------|-------------------|-------------------|-------------------|-------------------|-------------------|-------------------|-------------------|-------------------|-------------------|-------------------|-------------------|-------------------|-----------------|------------------|-----------------|-----------------|-----------------|-----------------|-----------------|-----------------|----------|----------|----------|----------|----------|----------|----------|----------|----------|------------|------------|------------|-----------|
| Oe07g41330TIM17-A | 33.8              | 27.9              | 28.4              | 18.6              | 16.9              | 16.2              | 15.7              | 17.8              | 16.2              | 16.4              | 14.9              | 12.9              | 14.4              | 19.3              | 15.6              | 15.3            | 16.2             | 34.5            | 39.1            | 21              | 16.4            | 16.4            | 14.4            | 15.2     | 18.9     | 16.7     | 13.8     | 15.2     | 13.6     | 11.9     | 15.1     | 20.5     | 15.5       | 18.5       | 12.8       |           |
| Oe03g30200TIM17-B | 39.9              | 22.4              | 20.3              | 31.5              | 19.1              | 22.5              | 20.2              | 19.6              | 16.5              | 15.8              | 23.9              | 16.4              | 18                | 20.1              | 13                | 18              | 15.3             | 54.5            | 49.4            | 36.1            | 19.8            | 19.8            | 22.4            | 17.8     | 17.3     | 16.3     | 19.3     | 21.3     | 20.4     | 20.4     | 19.9     | 36.5     | 13.5       | 18.2       | 14         |           |
| Oe05g07250TIM17-C | 44.1              | 28.8              | 23                | 14.8              | 13.9              | 15.8              | 15.1              | 19.5              | 17                | 16.1              | 15.3              | 12                | 15.6              | 18.5              | 13.4              | 15.3            | 13.9             | 22              | 24.1            | 17.3            | 13.1            | 13.1            | 15.3            | 13.9     | 17.9     | 19.1     | 12.6     | 13.6     | 11.8     | 10.3     | 17.1     | 16.1     | 16.3       | 15.4       | 11.2       |           |
| Oe03g30220TIM17-D | 39.9              | 30.1              | 36.5              |                   | 22.3              | 15.6              | 18.8              | 14.8              | 18.2              | 18.1              | 19.2              | 17.3              | 14                | 17.8              | 20.3              | 15.3            | 15.8             | 15.9            | 19.1            | 16.1            | 14.6            | 13.1            | 13.1            | 17.9     | 19.4     | 15.6     | 17.2     | 14.9     | 17.3     | 15.1     | 13.7     | 15.5     | 14.9       | 15.3       | 19         | 13.9      |
| Oe03g30230TIM17-E | 25.8              | 46.6              | 20.4              | 28.4              |                   | 17.9              | 20                | 21                | 20.9              | 18.9              | 17.9              | 20.4              | 19.2              | 21.3              | 21.2              | 16.9            | 17.2             | 18.4            | 27.3            | 21.9            | 22.4            | 17.9            | 17.9            | 20.2     | 19       | 20.2     | 22.1     | 16.2     | 19.1     | 20.3     | 20.1     | 23.4     | 22.2       | 15.2       | 13.4       | 15        |
| Oe03g18500TIM22-A | 24.5              | 34.5              | 21.3              | 22.7              | 32.1              |                   | 22.1              | 22.1              | 21.6              | 23.7              | 22.7              | 24.1              | 18                | 20.2              | 16.6              | 24.1            | 24.5             | 23.5            | 19.8            | 16.3            | 24.4            | 65.3            | 65.3            | 21.4     | 17.8     | 15.5     | 17.4     | 18.6     | 20.9     | 20.1     | 21.3     | 20.5     | 22.4       | 18         | 33         | 20        |
| Oe03g09870TIM22-B | 27.3              | 39.3              | 23                | 27.5              | 35                | 37.9              |                   | 68.5              | 48.3              | 19.8              | 22.7              | 19.2              | 16.7              | 18.8              | 20.4              | 18.5            | 18.8             | 18.4            | 21.8            | 20.7            | 20.9            | 20.8            | 20.8            | 53       | 48.6     | 21.8     | 22.2     | 15.7     | 22.1     | 20.2     | 19.7     | 20.5     | 26.1       | 17.8       | 23.9       | 16.9      |
| Oe10g22040TIM22-C | 25                | 34.5              | 22.1              | 24.5              | 39.7              | 34.5              | 79.3              |                   | 44.3              | 19.5              | 21.4              | 20.6              | 21.7              | 18.2              | 18.8              | 21.1            | 19.1             | 18.8            | 22.2            | 18.3            | 19.9            | 19.3            | 19.3            | 47.1     | 41.3     | 20.2     | 22.1     | 16.9     | 23.6     | 18.6     | 20.5     | 23       | 24.8       | 17.5       | 20.3       | 16.8      |
| Oe12g33020TIM22-D | 27                | 35.3              | 25.4              | 30.4              | 34                | 32.8              | 60                | 57.9              |                   | 19.9              | 20.9              | 21.9              | 17                | 16.3              | 17.6              | 18.1            | 20.2             | 17.6            | 16.4            | 19.1            | 20.4            | 20              | 20              | 45.5     | 43.4     | 20.2     | 21.6     | 17.4     | 16.3     | 21.9     | 17.4     | 21       | 22.7       | 19.8       | 21.5       | 17        |
| Oe03g02390TIM23-A | 25.8              | 32                | 25.2              | 25.1              | 30.9              | 39.2              | 34.5              | 33                | 32.8              |                   | 82.1              | 49.3              | 54.1              | 34.3              | 28.8              | 58.7            | 53.3             | 58.4            | 17.8            | 19.6            | 19.1            | 25.3            | 25.3            | 20.8     | 19.3     | 17.6     | 17.4     | 21.9     | 22.4     | 21.2     | 20       | 21.2     | 19.2       | 27.2       | 21.4       | 24        |
| Oe10g37530TIM23-B | 24.5              | 28.2              | 24.5              | 27.8              | 29.7              | 36.9              | 37.4              | 34.9              | 31.9              | 88.7              |                   | 50                | 45.6              | 33.8              | 28.7              | 57.4            | 52.6             | 58.2            | 20.1            | 18.9            | 19.4            | 24.2            | 24.2            | 21.5     | 19.4     | 17.5     | 16       | 23.6     | 22       | 18.3     | 20.4     | 21.1     | 18.6       | 24.8       | 21.1       | 22.7      |
| Oe02g45100TIM23-C | 23.7              | 39.3              | 23.7              | 28.1              | 30.7              | 38.2              | 38.4              | 39.7              | 35.3              | 67.8              | 88.3              |                   | 29.6              | 39.6              | 46.7              | 43.7            | 43.7             | 43.2            | 19.8            | 17.8            | 18.1            | 20.8            | 20.8            | 17       | 19.4     | 17.5     | 17       | 19.3     | 21.1     | 21.6     | 22       | 20.3     | 21.5       | 22.1       | 19.8       | 22        |
| Oe03g47300TIM23-D | 20.2              | 27.7              | 18.2              | 19.4              | 27.8              | 31.1              | 28.1              | 31.4              | 26.8              | 57.2              | 51.3              | 42.2              |                   | 24.6              | 20.7              | 36.5            | 33.9             | 35.8            | 15              | 14              | 16.9            | 21              | 21              | 19       | 15.3     | 17.2     | 16.3     | 19.4     | 23.6     | 20.5     | 17.2     | 21.5     | 22.9       | 15.9       | 18.3       | 22.1      |
| Oe04g47900TIM23-E | 21.2              | 29.6              | 21.6              | 23                | 29.9              | 31                | 29.1              | 28.4              | 26.8              | 47.4              | 44.6              | 48.2              | 32.8              |                   | 22.4              | 29.6            | 32.3             | 32              | 14.7            | 16.1            | 15.3            | 17.4            | 17.4            | 18.8     | 15.3     | 17.4     | 20.1     | 15       | 17.4     | 18.2     | 17.1     | 16.3     | 19.2       | 17.6       | 13.6       | 16.2      |
| Oe07g16150TIM23-F | 31.6              | 33.8              | 29                | 32.8              | 29.9              | 29.5              | 31.4              | 28.4              | 31.4              | 42.1              | 41.7              | 53.5              | 29.5              | 32.6              |                   | 26.2            | 26.1             | 25.1            | 17.6            | 18.5            | 15.5            | 16.5            | 16.5            | 17.8     | 18.1     | 15.7     | 17.5     | 18.3     | 18       | 14.5     | 17       | 16.8     | 18.4       | 20         | 16.2       | 17.7      |
| A1g17530TIM23-1   | 26.3              | 30.6              | 22.1              | 23.6              | 34.2              | 39.6              | 36.9              | 36.6              | 33.2              | 72.7              | 68.7              | 58.8              | 45.5              | 43.9              | 38                |                 | 51.6             | 63.5            | 18.4            | 15.2            | 20.2            | 21.6            | 21.6            | 18.3     | 16.3     | 17.3     | 15.1     | 19.5     | 18.7     | 20       | 19.1     | 17.5     | 17.9       | 24         | 20.1       | 19.5      |
| A1g172750TIM23-2  | 23                | 32                | 23.7              | 26.9              | 34.6              | 39.4              | 34.5              | 35.1              | 32.3              | 71.1              | 69.7              | 59.3              | 50                | 42                | 40.2              | 70.2            |                  | 52.9            | 16.6            | 14.3            | 17.9            | 23.4            | 23.4            | 19       | 18.5     | 20.1     | 20.4     | 19.4     | 21.4     | 22.1     | 18.5     | 18.9     | 18.3       | 22.7       | 22.5       | 20.1      |
| A3g04800TIM23-3   | 24.7              | 28.6              | 22.5              | 25.1              | 34.6              | 41.5              | 36                | 37.1              | 34                | 71.1              | 70.3              | 59.3              | 45.7              | 45.7              | 36.9              | 92              | 69.7             |                 | 16.9            | 14.4            | 18              | 21.5            | 21.5            | 19       | 19.2     | 17.2     | 18.5     | 22.5     | 19.9     | 18.5     | 18.3     | 18.4     | 17.8       | 24.4       | 20.5       | 21.4      |
| A1g20350TIM17-1   | 43.4              | 72.9              | 30.9              | 28.4              | 39.9              | 34.4              | 37.6              | 37.2              | 33.6              | 33.9              | 31.7              | 36.2              | 28                | 29.4              | 31.7              | 32.6            | 33.5             | 35.8            |                 | 59              | 35.8            | 15.2            | 15.2            | 23.1     | 19.5     | 18.3     | 16.4     | 17.7     | 19.7     | 18.9     | 19.7     | 19.9     | 34.9       | 19.8       | 17.9       | 18.5      |
| A2g37410TIM17-2   | 48.5              | 65                | 32.4              | 26.9              | 35.8              | 30                | 38.3              | 32.5              | 36.2              | 32.5              | 31.3              | 34.6              | 28.4              | 32.1              | 31.7              | 32.1            | 27.2             | 30.9            | 72.8            |                 | 33.7            | 15.6            | 15.6            | 19.3     | 19.6     | 16.8     | 17.3     | 14.8     | 19.5     | 16.6     | 13.3     | 16.1     | 31.3       | 17.5       | 18.8       | 15.4      |
| A5g11690TIM17-3   | 26.5              | 47.1              | 23.3              | 20.6              | 34.8              | 36.5              | 31.5              | 30.4              | 30.6              | 31.4              | 31.8              | 32.7              | 36.2              | 26.7              | 23.2              | 33.7            | 34.6             | 32.4            | 46.8            | 43.2            |                 | 22.5            | 22.5            | 22.5     | 18.9     | 17.1     | 16.5     | 24       | 22.1     | 22.5     | 22.9     | 16.9     | 35.8       | 17         | 19.8       | 17.2      |
| A3g10110TIM22-2   | 24.2              | 35                | 21.6              | 22.7              | 31                | 82.7              | 36.5              | 35.1              | 29.8              | 37.6              | 36.9              | 32.2              | 32.4              | 33.7              | 28.4              | 42.2            | 38.8             | 42.6            | 34.4            | 26.3            | 34.7            |                 | 100             | 23.4     | 20.2     | 17.4     | 15.8     | 20.1     | 16.9     | 22.4     | 21.3     | 22.7     | 19.7       | 16.6       | 27.7       | 23.6      |
| A1g18320TIM22-1   | 24.2              | 35                | 21.6              | 22.7              | 31                | 82.7              | 36.5              | 35.1              | 29.8              | 37.6              | 36.9              | 32.2              | 32.4              | 33.7              | 28.4              | 42.2            | 38.8             | 42.6            | 34.4            | 26.3            | 34.7            | 100             |                 | 23.4     | 20.2     | 17.4     | 15.8     | 20.1     | 16.9     | 22.4     | 21.3     | 22.7     | 19.7       | 16.6       | 27.7       | 23.6      |
| A4g26670          | 24.2              | 39                | 22.1              | 29.3              | 33.3              | 34.8              | 67.1              | 63.8              | 62.6              | 34.8              | 36.7              | 35.2              | 30                | 30                | 30.6              | 32.9            | 31.9             | 36.2            | 40.4            | 34.2            | 29.5            | 37.1            | 37.1            |          | 68.6     | 19       | 19.9     | 14.3     | 19       | 18.6     | 17.5     | 17.5     | 23.9       | 15.3       | 18.9       | 14.8      |
| A5g55510          | 25.5              | 34.7              | 28.1              | 31                | 30.6              | 31                | 59.5              | 55                | 62.4              | 32.8              | 32.6              | 34.7              | 24.8              | 28.1              | 32.5              | 29.8            | 34.3             | 32.2            | 38.4            | 36.2            | 27.7            | 34.3            | 34.3            | 77.7     |          | 18.7     | 19.3     | 16.9     | 18.5     | 16.9     | 15.6     | 17.1     | 20.4       | 16.6       | 20.6       | 18.2      |
| A3g49560          | 30.1              | 31.8              | 27.1              | 30.1              | 30.3              | 29.1              | 36                | 34.9              | 38.7              | 31.4              | 33.7              | 34.1              | 27.2              | 26.8              | 28                | 31.4            | 35.2             | 29.9            | 31              | 33.3            | 26.4            | 28.7            | 28.7            | 35.2     | 37.9     |          | 82.6     | 16       | 17.9     | 15.2     | 15.3     | 23.7     | 16.5       | 19.8       | 21.2       | 14.9      |
| A5g24650          | 28.8              | 32                | 27.6              | 33.4              | 30.9              | 30.1              | 38.6              | 35.1              | 37.1              | 32                | 29.7              | 32                | 26.6              | 30.1              | 32.5              | 29              | 35.9             | 32.4            | 32.8            | 34              | 26.3            | 27.8            | 27.8            | 35.5     | 39       | 90.8     |          | 15.4     | 18.3     | 16.6     | 15.8     | 22       | 18.5       | 19.7       | 19.7       | 52.7      |
| A2g28900          | 22.2              | 34                | 19.7              | 21.2              | 26.7              | 39.5              | 27.1              | 27.8              | 27.2              | 32.5              | 32.8              | 34.7              | 38.5              | 23.5              | 29.2              | 33.7            | 33.5             | 35.1            | 29.8            | 26.7            | 38.5            | 33.5            | 33.5            | 30       | 26.9     | 26.4     | 26.6     |          | 26       | 21.4     | 26.5     | 15.9     | 19.3       | 19.2       | 20.2       | 30.7      |
| A4g16160          | 24.2              | 35.4              | 21.1              | 25.1              | 32.1              | 38.2              | 35.5              | 39.2              | 30.6              | 38.7              | 33.3              | 39.2              | 30.9              | 29.4              | 30.6              | 37.4            | 39.9             | 36.7            | 37.6            | 31.7            | 37.1            | 38.2            | 38.2            | 31.4     | 31.8     | 31.8     | 29       | 48.9     |          | 19.9     | 25.1     | 18       | 23.3       | 19.9       | 18.8       | 23.2      |
| A2g42210          | 21.2              | 34                | 18.2              | 24.8              | 35.8              | 38.3              | 32.5              | 34.5              | 30.6              | 35.6              | 34.4              | 33.2              | 32.7              | 29.4              | 25.1              | 35.8            | 41               | 31.4            | 32.6            | 28.4            | 33.3            | 37              | 37              | 30       | 28.9     | 28.7     | 30.5     | 41.5     | 37.8     |          | 22.1     | 21.7     | 20.2       | 18.6       | 25.6       | 24.3      |
| A3g62880          | 17.7              | 29.6              | 16.8              | 20.9              | 28.9              | 35.9              | 29.1              | 34.5              | 31.1              | 32.5              | 31.8              | 36.7              | 34.8              | 24.1              | 27.3              | 36.4            | 33               | 34              | 31.2            | 25.1            | 39              | 36.4            | 36.4            | 30       | 27.3     | 24.1     | 27       | 40.5     | 40.4     | 39       |          | 18.8     | 19.5       | 13.3       | 20.2       | 16.7      |
| A3g25120          | 24                | 37.9              | 23.7              | 26.8              | 39.2              | 37                | 36.5              | 41.2              | 34.9              | 38.1              | 37.9              | 37.7              | 32.3              | 29.6              | 27.7              | 34.9            | 36               | 34.9            | 38.1            | 33.3            | 30.7            | 4               |                 |          |          |          |          |          |          |          |          |          |            |            |            |           |
