# Supplementary material
Source: PubMed Central journal article supplement (PMC1761978)

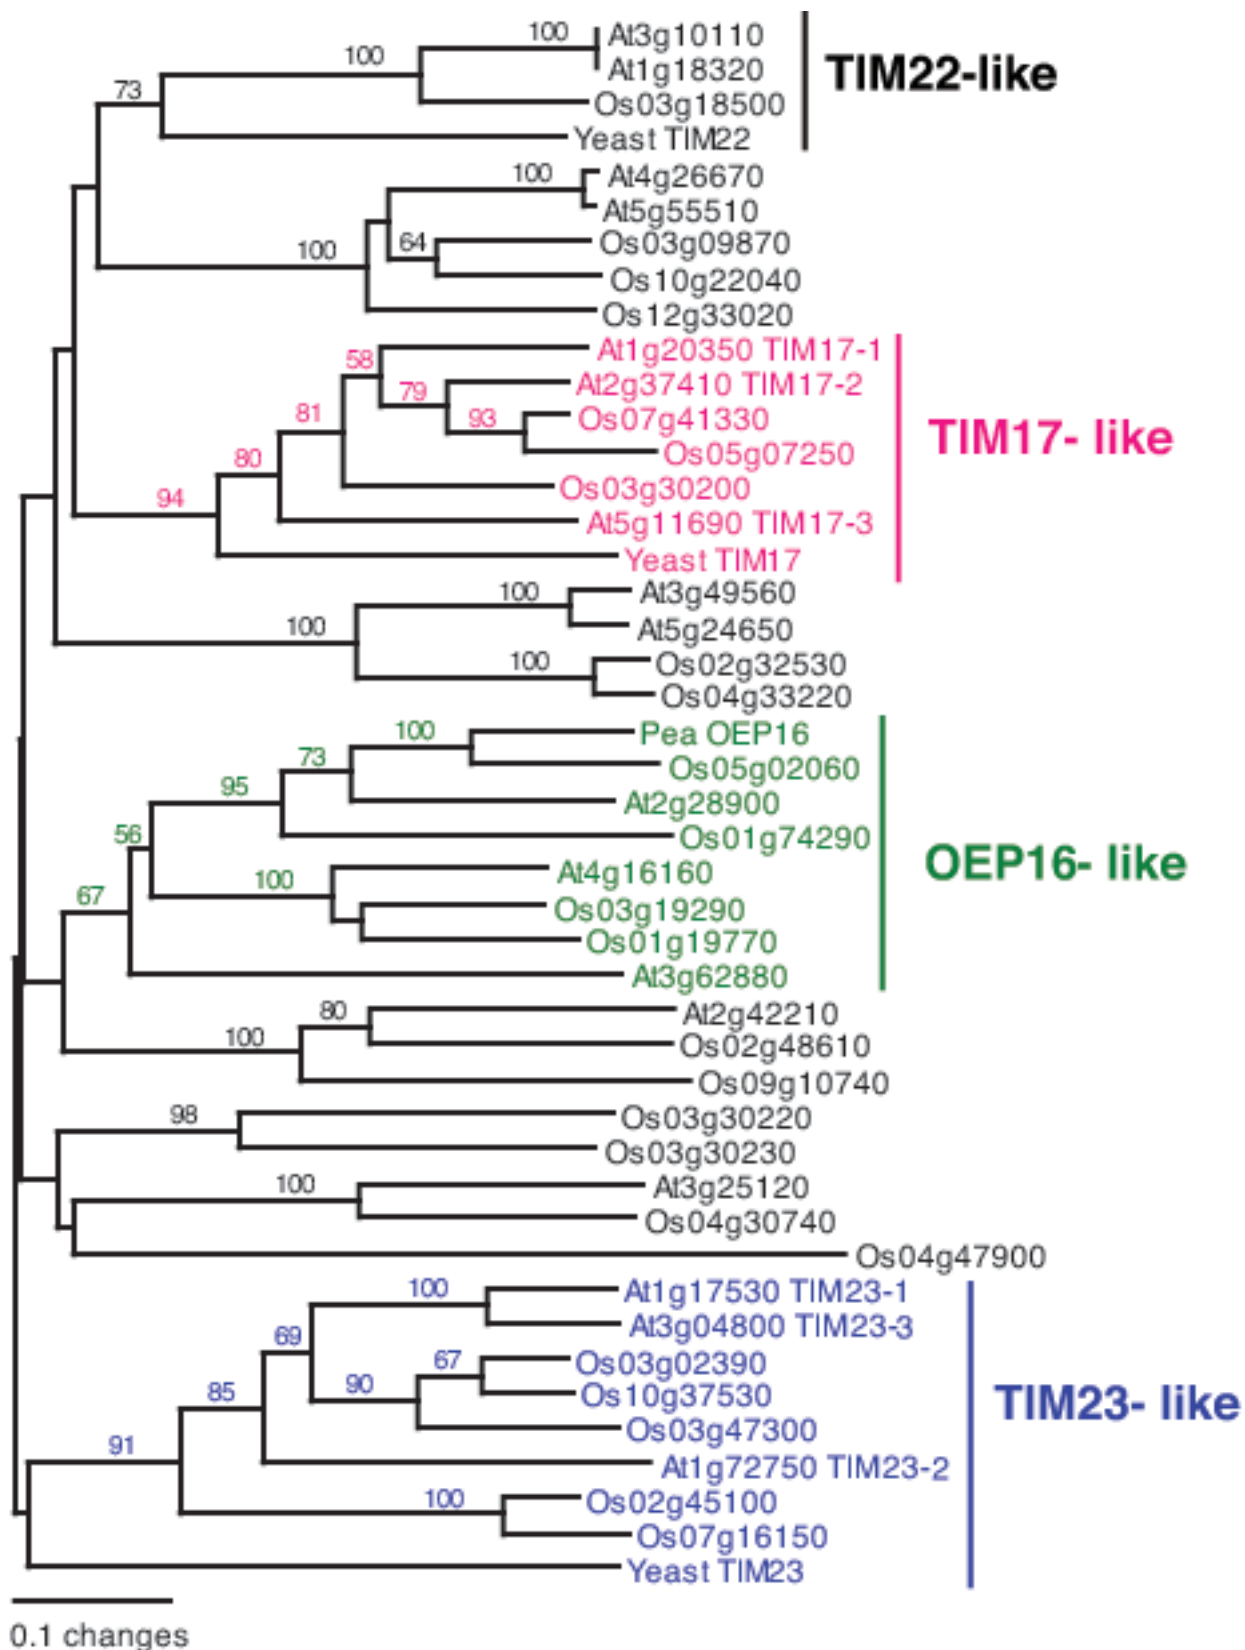

Supplementary Figure 2

Supplement: plntphys_pp.106.090688_1.pdf [file plntphys_pp.106.090688_1.pdf]
